# Supplementary material for: Contribution of Ternary Reaction to Pd Sorption on MX-80 in Na-Ca-Cl Solution at High Ionic Strength
Source: Hindawi journal article supplement (doi:10.1155/2019/6572606), 2019-06-24
Supplement: f1 [file 6572606.f1.pdf]

## Supplementary Materials

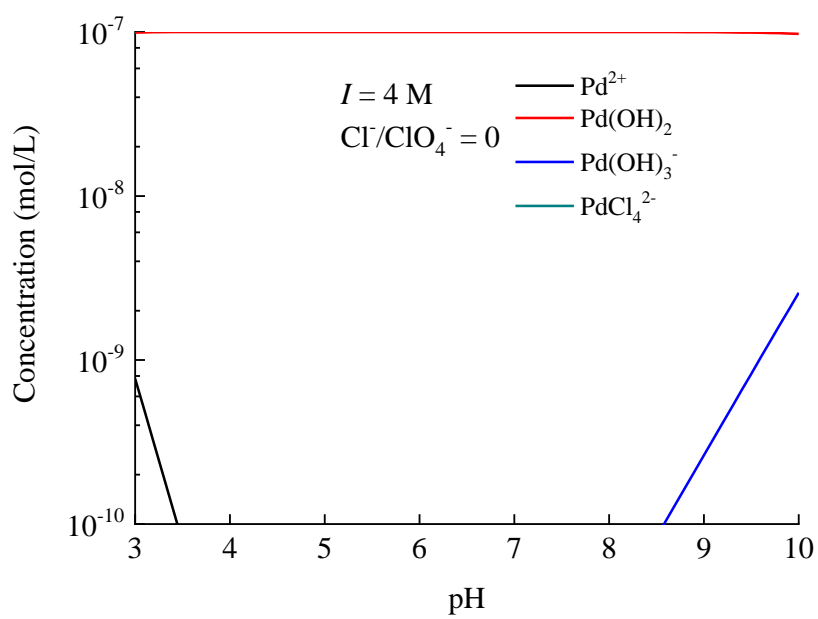

Figure S-1: Pd speciation in Na-Ca-Cl-ClO<sub>4</sub> solution (Cl<sup>-</sup>/ClO<sub>4</sub><sup>-</sup> molar concentration ratio = 0) at  $I = 4 \text{ M}$ .

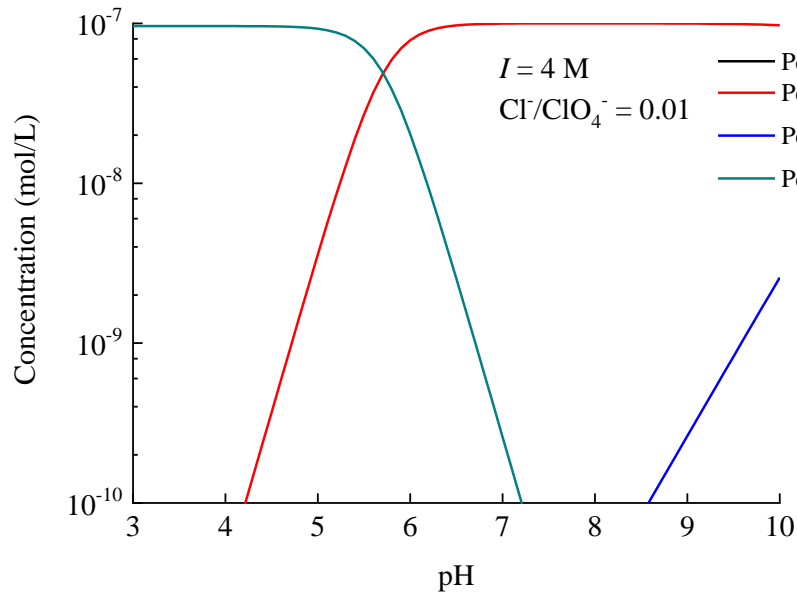

Figure S-2: Pd speciation in Na-Ca-Cl-ClO<sub>4</sub> solution (Cl<sup>-</sup>/ClO<sub>4</sub><sup>-</sup> molar concentration ratio = 0.01) at  $I = 4$  M.

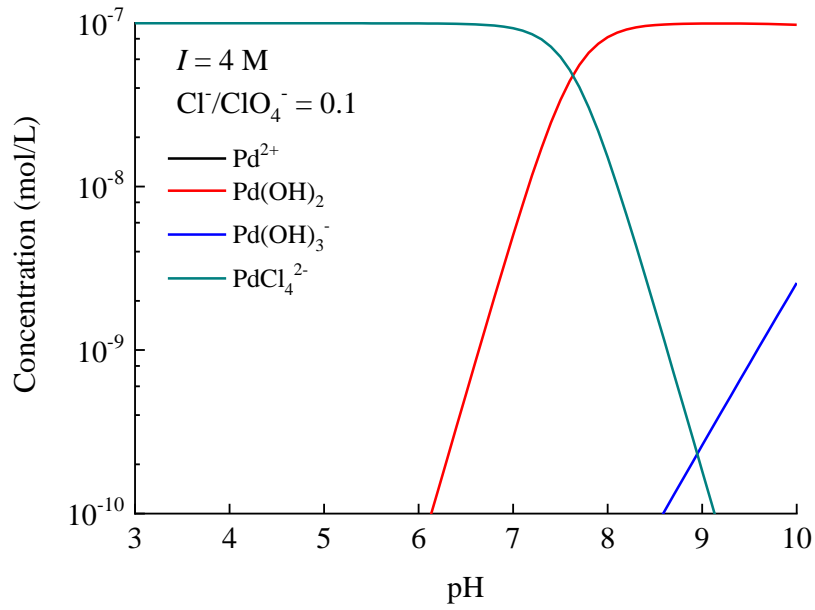

Figure S-3: Pd speciation in Na-Ca-Cl-ClO<sub>4</sub> solution (Cl<sup>-</sup>/ClO<sub>4</sub><sup>-</sup> molar concentration ratio = 0.1) at  $I = 4$  M.

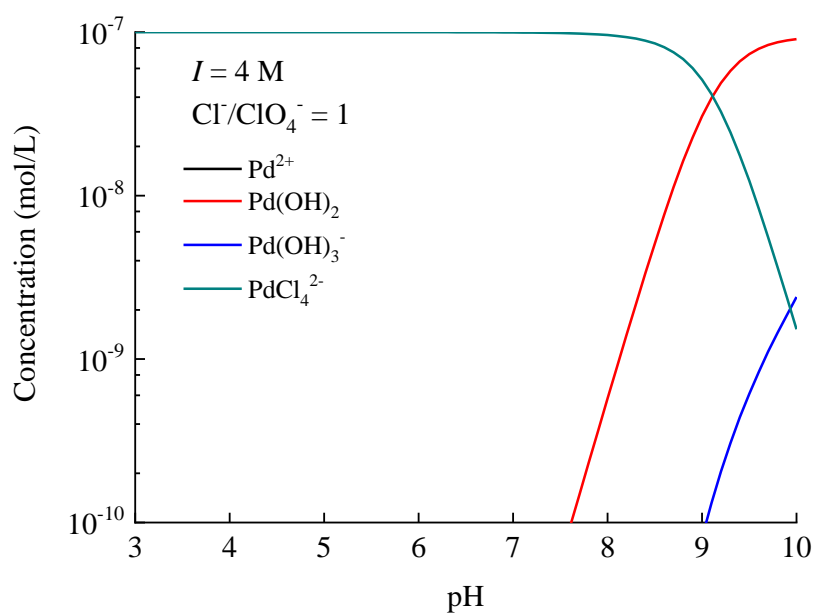

Figure S-4: Pd speciation in Na-Ca-Cl-ClO<sub>4</sub> solution (Cl<sup>-</sup>/ClO<sub>4</sub><sup>-</sup> molar concentration ratio = 1) at  $I = 4$  M.

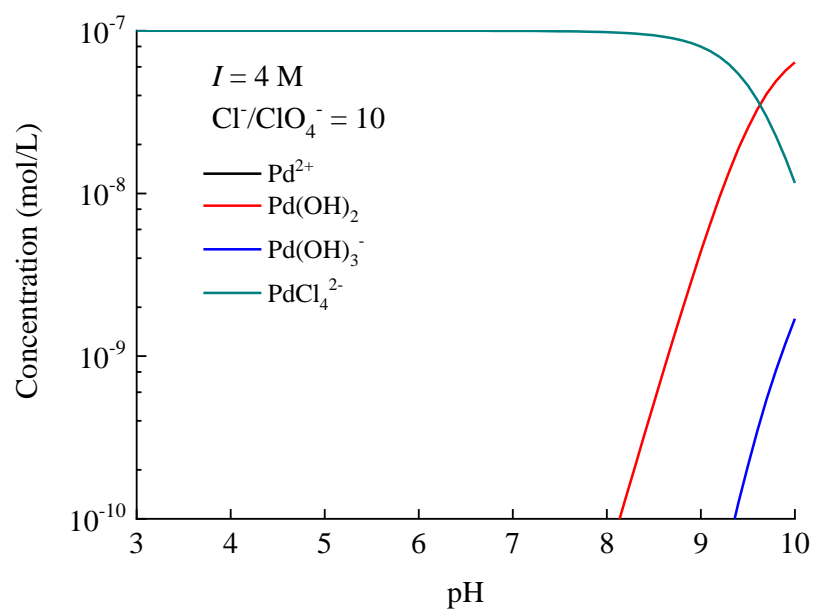

Figure S-5: Pd speciation in Na-Ca-Cl-ClO<sub>4</sub> solution (Cl<sup>-</sup>/ClO<sub>4</sub><sup>-</sup> molar concentration ratio = 10) at  $I = 4$  M.

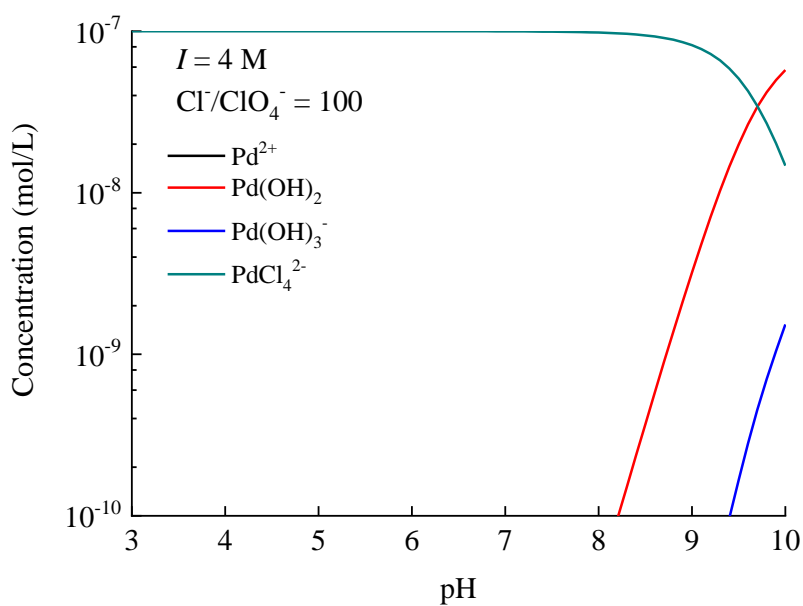

Figure S-6: Pd speciation in Na-Ca-Cl-ClO<sub>4</sub> solution (Cl<sup>-</sup>/ClO<sub>4</sub><sup>-</sup> molar concentration ratio = 100) at  $I = 4$  M.

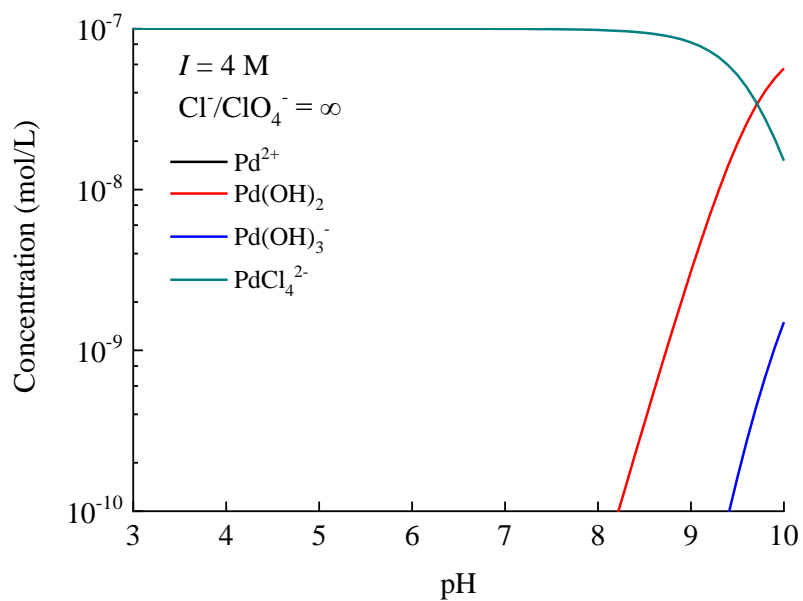

Figure S-7: Pd speciation in Na-Ca-Cl-ClO<sub>4</sub> solution (Cl<sup>-</sup>/ClO<sub>4</sub><sup>-</sup> molar concentration ratio =  $\infty$ ) at  $I = 4$  M.

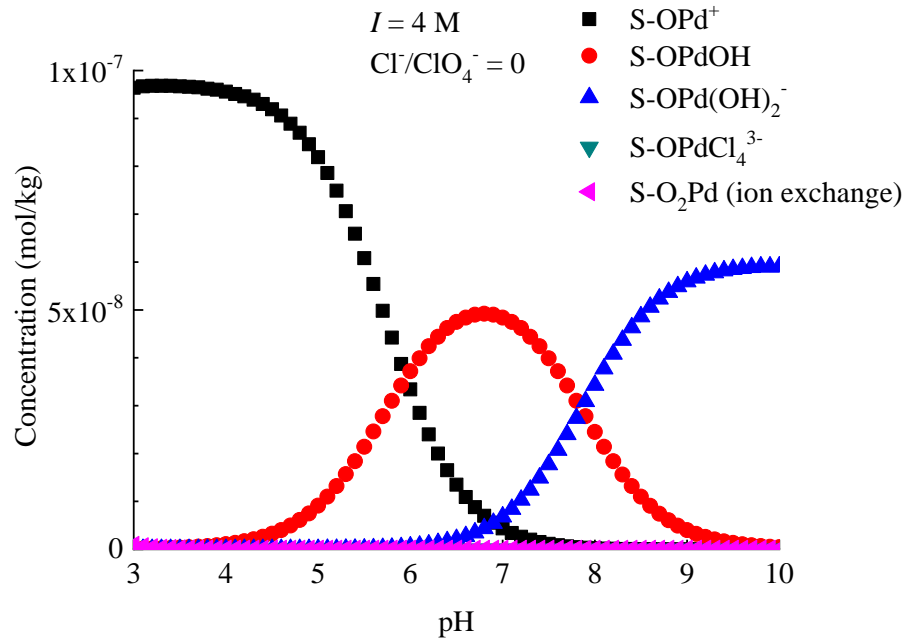

Figure S-8: Pd sorption reaction on MX-80 in Na-Ca-Cl-ClO<sub>4</sub> solution (Cl<sup>-</sup>/ClO<sub>4</sub><sup>-</sup> molar concentration ratio = 0) at *I* = 4 M.

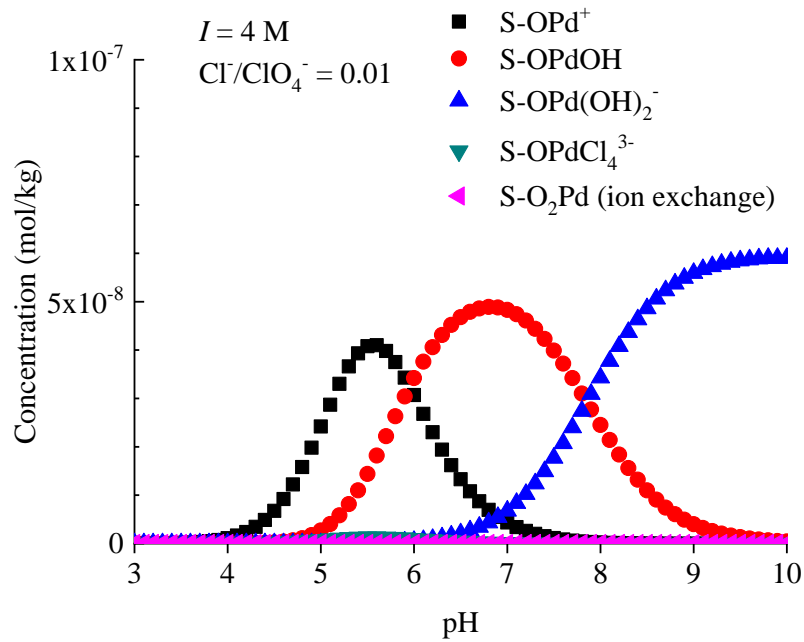

Figure S-9: Pd sorption reaction on MX-80 in Na-Ca-Cl-ClO<sub>4</sub> solution (Cl<sup>-</sup>/ClO<sub>4</sub><sup>-</sup> molar concentration ratio = 0.01) at *I* = 4 M.

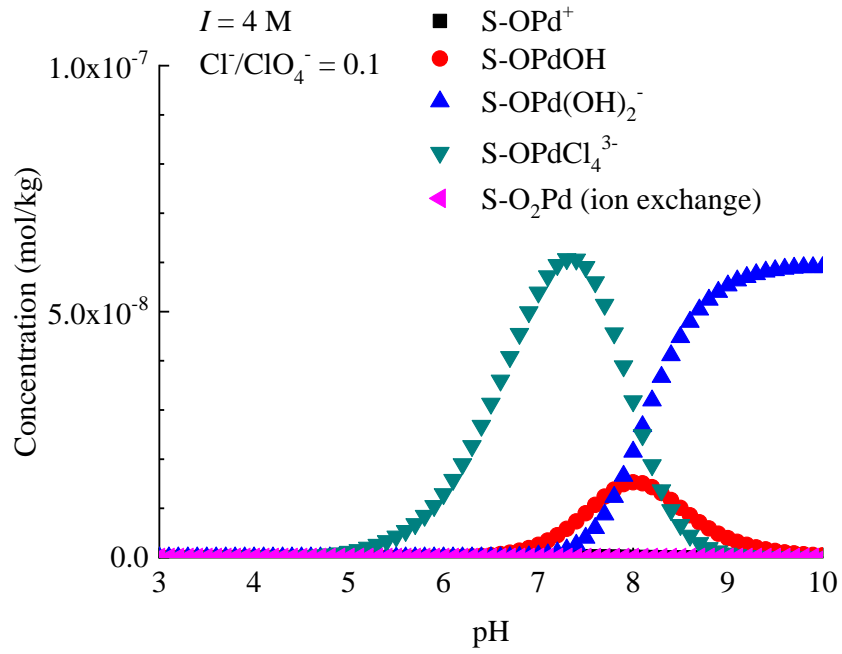

Figure S-10: Pd sorption reaction on MX-80 in Na-Ca-Cl-ClO<sub>4</sub> solution (Cl<sup>-</sup>/ClO<sub>4</sub><sup>-</sup> molar concentration ratio = 0.1) at  $I = 4 \text{ M}$ .

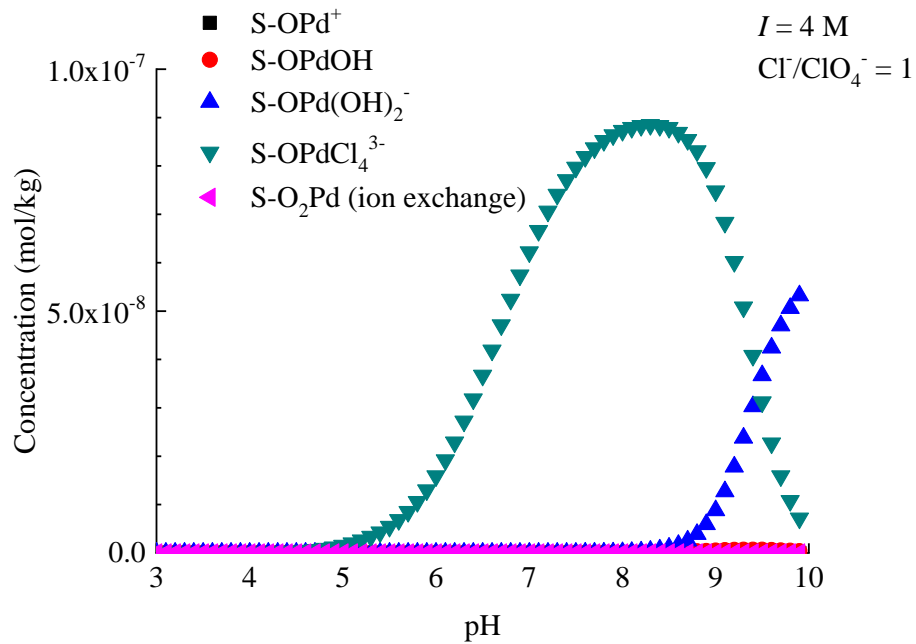

Figure S-11: Pd sorption reaction on MX-80 in Na-Ca-Cl-ClO<sub>4</sub> solution (Cl<sup>-</sup>/ClO<sub>4</sub><sup>-</sup> molar concentration ratio = 1) at  $I = 4 \text{ M}$ .

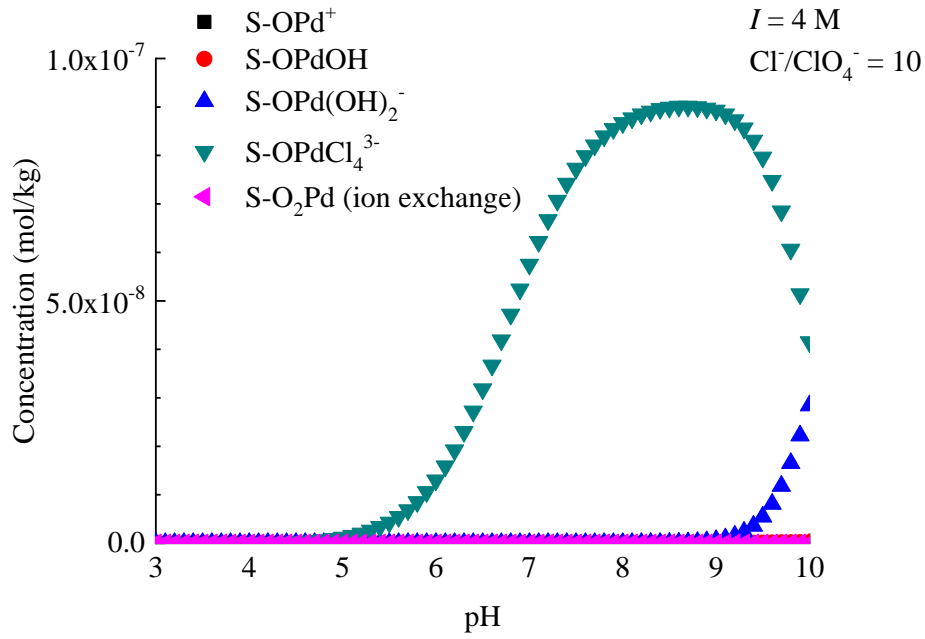

Figure S-12: Pd sorption reaction on MX-80 in Na-Ca-Cl-ClO<sub>4</sub> solution (Cl<sup>-</sup>/ClO<sub>4</sub><sup>-</sup> molar concentration ratio = 10) at  $I = 4$  M.

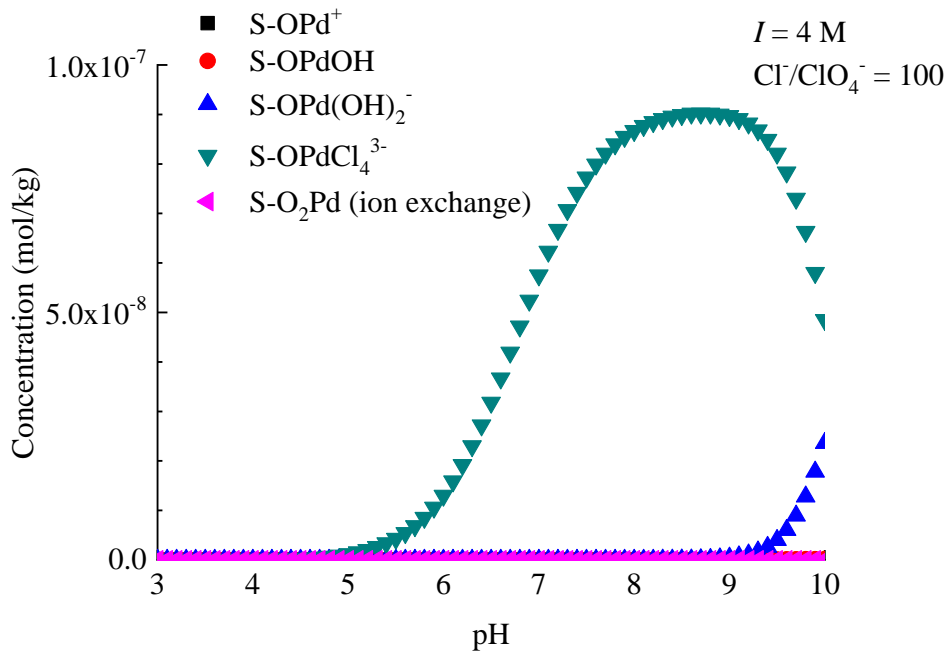

Figure S-13: Pd sorption reaction on MX-80 in Na-Ca-Cl-ClO<sub>4</sub> solution (Cl<sup>-</sup>/ClO<sub>4</sub><sup>-</sup> molar concentration ratio = 100) at  $I = 4$  M.

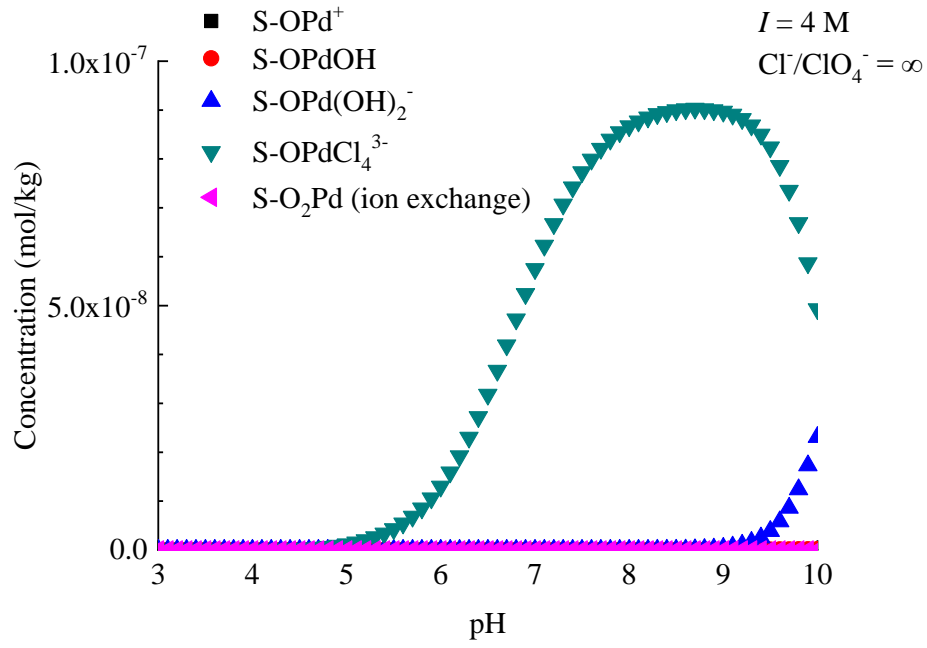

Figure S-14: Pd sorption reaction on MX-80 in Na-Ca-Cl-ClO<sub>4</sub> solution (Cl<sup>-</sup>/ClO<sub>4</sub><sup>-</sup> molar concentration ratio = ∞) at  $I = 4 \text{ M}$ .
